# Supplementary figures and images for: Acupuncture Decreases Risk of Hypertension in Patients with Chronic Spontaneous Urticaria in Taiwan: A Nationwide Study
Source: MDPI journal article supplement (doi:10.3390/healthcare11101510), 2023-05-22

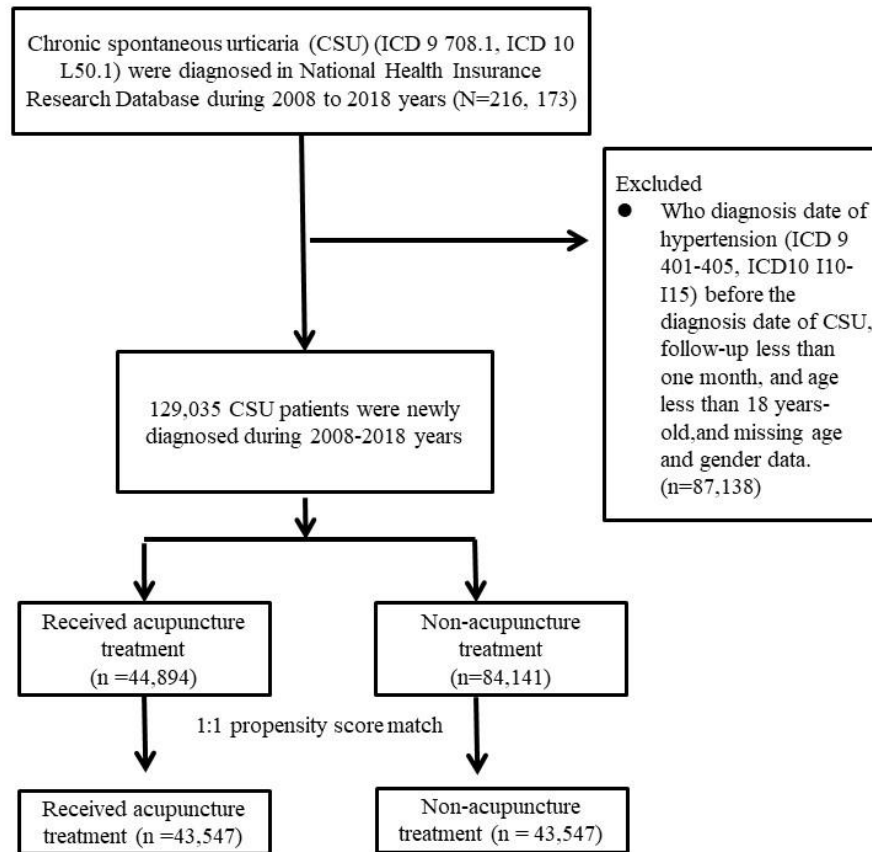

Figure S1: flow chart.

Supplement: s1 [file s1]
